# Supplementary material for: Investigation of Pharmacologically Important Polyphenolic Secondary Metabolites in Plant-based Food Samples Using HPLC-DAD
Source: MDPI journal article supplement (doi:10.3390/plants13101311), 2024-05-10
Supplement: s1 [file s1]

# Investigation of Pharmacologically Important Polyphenolic Secondary Metabolites in Plant-based Food Samples Using HPLC-DAD

Naheed Akhtar <sup>1</sup>, Amna Jabbar Siddiqui <sup>2</sup>, Muhammad Ramzan <sup>1</sup>, Jalal Uddin <sup>3</sup>, Mufarreh Asmari <sup>3</sup>, Hesham R. El-Seedi <sup>4</sup> and Syed Ghulam Musharraf <sup>1,2,5,\*</sup>

<sup>1</sup> H.E.J. Research Institute of Chemistry, International Center for Chemical and Biological Sciences, University of Karachi, Karachi 75270, Pakistan; naheedakhtar41@yahoo.com (N.A.); rafridi73@gmail.com (M.R.)

<sup>2</sup> Dr. Panjwani Center for Molecular Medicine and Drug Research, International Center for Chemical and Biological Sciences, University of Karachi, Karachi 75270, Pakistan; amna.jabbar@iccs.edu

<sup>3</sup> Department of Pharmaceutical Chemistry, College of Pharmacy, King Khalid University, Abha 61421, Saudi Arabia; jalaluddinamin@gmail.com (J.U.); masmri@kku.edu.sa (M.A.)

<sup>4</sup> Department of Chemistry, Faculty of Science, Islamic University of Madinah, Madinah, 42351, Saudi Arabia ; hesham.el-seedi@ilk.uu.se

<sup>5</sup> The Affiliated T.C.M Hospital of Southwest Medical University, Luzhou, 646600, China

\* Correspondence: musharraf@iccs.edu or musharraf1977@yahoo.com; Tel.: +92-213-4824924-5; Fax: + 92-213-4819018-9

## **Supplementary Material**

### **List of Supplementary Figure**

**Supplementary Fig. 1.** The comparison of pools 1-4 on different gradient systems.

**Supplementary Fig. 2.** The comparison of standard compounds of each pool (a) pool-1, (b) pool-2, (c) pool-3, (d) pool-4 with analyzed real samples.

### **List of Supplementary Tables**

**Supplementary Table S1.** The %accuracy and %RSD of all compounds.

**Supplementary Table S2.** The quantified results of food samples in mg/Kg.

**Supplementary Table S3.** Results of the percent recovery study.

**Supplementary Table S4.** Tested gradient systems for the final optimization of HPLC methods.

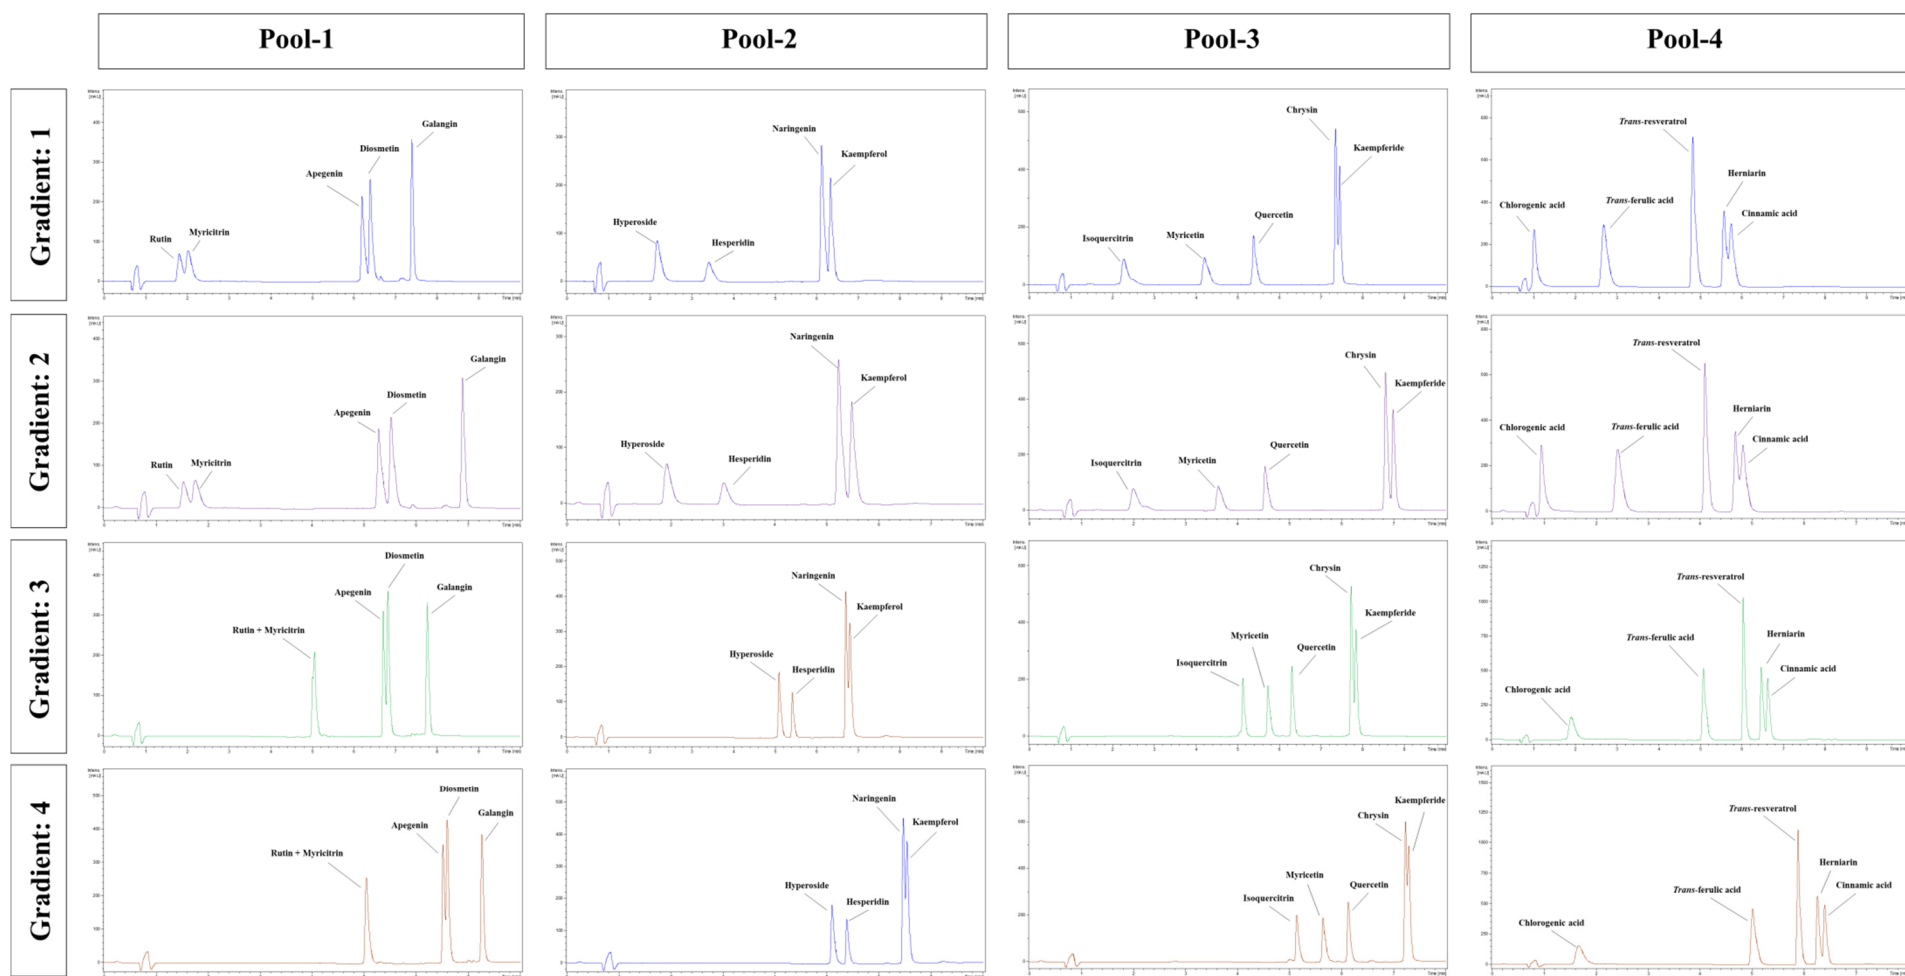

Pool-1: Rutin, Myricitrin, Apigenin, Diosmetin and Galangin  
 Pool-2: Hyperoside, Hesperidin, Naringenin and Kaempferol  
 Pool-3: Isoquercitrin, Myricetin, Quercetin, Chrysin and Kaempferide  
 Pool-4: Chlorogenic acid, *Trans*-ferulic acid, *Trans*-resveratrol, Herniarin and Cinnamic acid

**Supplementary Fig. 1.** The comparison of pools 1-4 on different gradient systems.

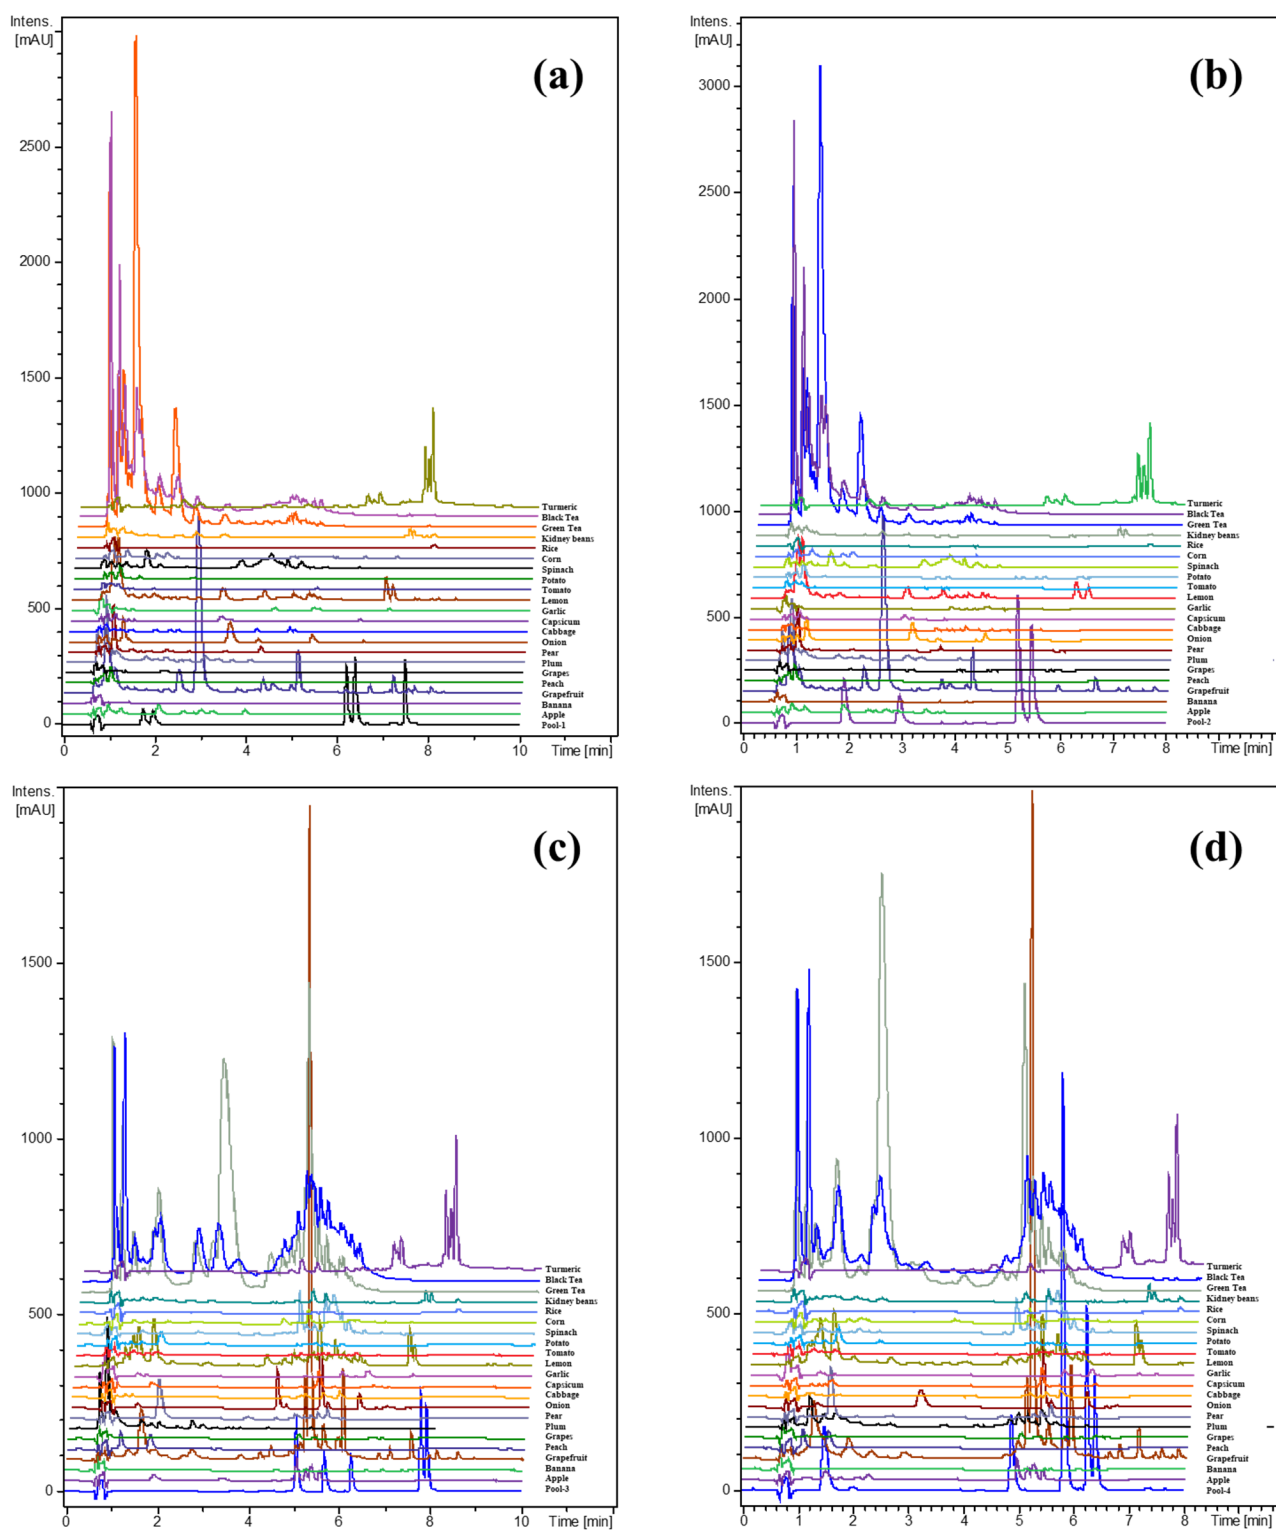

**Supplementary Fig. 2.** The comparison of standard compounds of each pool (a) pool-1, (b) pool-2, (c) pool-3, (d) pool-4 with analyzed real samples.

**Supplementary Table S1.** The %accuracy and %RSD of all compounds.

| POOL-1        |                                    |                        |      |           |                        |      |           |
|---------------|------------------------------------|------------------------|------|-----------|------------------------|------|-----------|
| Compound Name | Concentrations in $\mu\text{g/ml}$ | Intra-day              | %RSD | %Accuracy | Inter-day              | %RSD | %Accuracy |
|               |                                    | Found concentration in |      |           | Found concentration in |      |           |
|               |                                    | $\mu\text{g/mL}$       |      |           | $\mu\text{g/mL}$       |      |           |
| Rutin         | 100                                | $99.2 \pm 0.9$         | 0.91 | 99.21     | $96 \pm 3$             | 3.59 | 95.93     |
|               | 400                                | $399 \pm 5$            | 1.24 | 99.57     | $401 \pm 3$            | 0.69 | 100.15    |
|               | 800                                | $805 \pm 5$            | 0.60 | 100.60    | $806 \pm 5$            | 0.58 | 100.78    |
| Myricitrin    | 100                                | $103 \pm 3$            | 3.04 | 103.17    | $107 \pm 2$            | 1.56 | 107.26    |
|               | 400                                | $402.2 \pm 0.2$        | 0.04 | 100.53    | $405 \pm 5$            | 1.10 | 101.37    |
|               | 800                                | $793 \pm 1$            | 0.15 | 99.09     | $790 \pm 2$            | 0.21 | 98.77     |
| Apigenin      | 100                                | $102.5 \pm 0.2$        | 0.15 | 102.53    | $105 \pm 4$            | 4.01 | 105.54    |
|               | 400                                | $399 \pm 2$            | 0.60 | 99.63     | $401 \pm 4$            | 0.97 | 100.18    |
|               | 800                                | $801 \pm 8$            | 1.02 | 100.09    | $796 \pm 7$            | 0.86 | 99.50     |
| Diosmetin     | 100                                | $101.5 \pm 0.2$        | 0.21 | 101.47    | $104 \pm 4$            | 3.85 | 104.26    |
|               | 400                                | $402 \pm 3$            | 0.70 | 100.42    | $403 \pm 2$            | 0.50 | 100.69    |
|               | 800                                | $800 \pm 3$            | 0.40 | 99.97     | $796 \pm 3$            | 0.42 | 99.56     |
| Galangin      | 100                                | $99 \pm 2$             | 2.10 | 99.30     | $100 \pm 2$            | 2.01 | 99.59     |
|               | 400                                | $400 \pm 1$            | 0.37 | 100.06    | $402 \pm 4$            | 0.98 | 100.45    |

|               | 800                            | 797 ± 4                   | 0.51 | 99.65     | 798 ± 1                   | 0.16 | 99.79     |
|---------------|--------------------------------|---------------------------|------|-----------|---------------------------|------|-----------|
| <b>POOL-2</b> |                                |                           |      |           |                           |      |           |
| Compound Name | Concentrat<br>ions in<br>µg/ml | Intra-day                 | %RSD | %Accuracy | Inter-day                 | %RSD | %Accuracy |
|               |                                | Found<br>concentration in |      |           | Found<br>concentration in |      |           |
|               |                                | µg/mL                     |      |           | µg/mL                     |      |           |
| Hyperoside    | 100                            | 103 ± 5                   | 4.34 | 103.03    | 101 ± 4                   | 3.92 | 101.39    |
|               | 400                            | 396 ± 1                   | 0.25 | 99.02     | 412 ± 3                   | 0.62 | 102.90    |
|               | 800                            | 798 ± 1                   | 0.18 | 99.70     | 798 ± 2                   | 0.23 | 99.74     |
| Hesperidin    | 100                            | 104 ± 3                   | 2.67 | 104.14    | 103 ± 3                   | 2.53 | 103.43    |
|               | 400                            | 400 ± 2                   | 0.41 | 99.92     | 403.0 ± 0.4               | 0.09 | 100.76    |
|               | 800                            | 800 ± 2                   | 0.27 | 100.06    | 808 ± 9                   | 1.16 | 100.95    |
| Naringenin    | 100                            | 102 ± 1                   | 1.41 | 101.56    | 102 ± 4                   | 3.55 | 102.84    |
|               | 400                            | 400 ± 4                   | 0.92 | 99.74     | 408 ± 1                   | 0.23 | 102.01    |
|               | 800                            | 803± 4                    | 0.45 | 100.43    | 804 ± 5                   | 0.67 | 100.55    |
| Kaempferol    | 100                            | 98 ± 3                    | 2.61 | 97.55     | 101 ± 3                   | 2.80 | 100.62    |
|               | 400                            | 398 ± 3                   | 0.73 | 99.59     | 399.3 ± 0.9               | 0.22 | 99.84     |
|               | 800                            | 805 ± 3                   | 0.36 | 100.58    | 801 ± 3                   | 0.34 | 100.17    |
| <b>POOL-3</b> |                                |                           |      |           |                           |      |           |
| Compound Name | Concentrat<br>ions in          | Intra-day                 | %RSD | %Accuracy | Inter-day                 | %RSD | %Accuracy |
|               |                                | Found                     |      |           | Found                     |      |           |

|                      | $\mu\text{g/ml}$                          | concentration in          |      |           | concentration in          |      |           |
|----------------------|-------------------------------------------|---------------------------|------|-----------|---------------------------|------|-----------|
|                      |                                           | $\mu\text{g/mL}$          |      |           | $\mu\text{g/mL}$          |      |           |
| <b>Isoquercitrin</b> | 100                                       | $100 \pm 2$               | 2.29 | 99.83     | $101 \pm 5$               | 4.66 | 100.73    |
|                      | 400                                       | $402 \pm 2$               | 0.43 | 100.52    | $409 \pm 8$               | 1.90 | 102.27    |
|                      | 800                                       | $804 \pm 7$               | 0.85 | 100.50    | $820 \pm 10$              | 1.48 | 102.54    |
| <b>Myricetin</b>     | 100                                       | $100 \pm 1$               | 1.16 | 100.24    | $104 \pm 5$               | 4.68 | 103.87    |
|                      | 400                                       | $406 \pm 5$               | 1.18 | 101.41    | $408.5 \pm 0.2$           | 0.06 | 102.13    |
|                      | 800                                       | $799 \pm 3$               | 0.40 | 99.91     | $795 \pm 7$               | 0.88 | 99.48     |
| <b>Quercetin</b>     | 100                                       | $101 \pm 1$               | 1.24 | 100.89    | $104 \pm 4$               | 4.37 | 104.11    |
|                      | 400                                       | $397 \pm 2$               | 0.43 | 99.19     | $395 \pm 2$               | 0.50 | 98.88     |
|                      | 800                                       | $800 \pm 2$               | 0.23 | 99.98     | $799 \pm 4$               | 0.46 | 99.87     |
| <b>Chrysin</b>       | 100                                       | $100 \pm 1$               | 1.22 | 99.56     | $99 \pm 3$                | 2.67 | 98.76     |
|                      | 400                                       | $398.2 \pm 0.8$           | 0.20 | 99.54     | $392 \pm 8$               | 1.91 | 97.99     |
|                      | 800                                       | $804 \pm 1$               | 0.13 | 100.46    | $807 \pm 5$               | 0.59 | 100.88    |
| <b>Kaempferide</b>   | 100                                       | $103 \pm 1$               | 0.98 | 103.21    | $107 \pm 4$               | 4.04 | 107.12    |
|                      | 400                                       | $395 \pm 2$               | 0.42 | 98.67     | $398 \pm 7$               | 1.66 | 99.51     |
|                      | 800                                       | $800 \pm 1$               | 0.16 | 100.02    | $808 \pm 10$              | 1.20 | 101.02    |
| <b>POOL-4</b>        |                                           |                           |      |           |                           |      |           |
| Compound Name        | Concentrat<br>ions in<br>$\mu\text{g/ml}$ | Intra-day                 | %RSD | %Accuracy | Inter-day                 | %RSD | %Accuracy |
|                      |                                           | Found<br>concentration in |      |           | Found<br>concentration in |      |           |

|                                  |     | $\mu\text{g/mL}$ |      |        | $\mu\text{g/mL}$ |      |        |
|----------------------------------|-----|------------------|------|--------|------------------|------|--------|
| <b>Chlorogenic Acid</b>          | 100 | $101.6 \pm 0.5$  | 0.55 | 101.58 | $102 \pm 2$      | 2.02 | 102.41 |
|                                  | 400 | $397.1 \pm 0.8$  | 0.20 | 99.28  | $394 \pm 4$      | 1.07 | 98.42  |
|                                  | 800 | $805 \pm 2$      | 0.23 | 100.59 | $810 \pm 5$      | 0.65 | 101.29 |
| <b><i>Trans</i>-Ferulic Acid</b> | 100 | $103 \pm 2$      | 1.71 | 103.39 | $104 \pm 2$      | 2.03 | 103.55 |
|                                  | 400 | $401 \pm 1$      | 0.36 | 100.16 | $393 \pm 9$      | 2.41 | 98.33  |
|                                  | 800 | $798 \pm 5$      | 0.64 | 99.75  | $795 \pm 5$      | 0.66 | 99.32  |
| <b><i>Trans</i>-Resveratrol</b>  | 100 | $98 \pm 1$       | 1.05 | 98.45  | $103 \pm 4$      | 4.16 | 102.60 |
|                                  | 400 | $400 \pm 2$      | 0.47 | 100.09 | $400 \pm 3$      | 0.81 | 100.12 |
|                                  | 800 | $800 \pm 5$      | 0.58 | 100.07 | $798 \pm 4$      | 0.47 | 99.75  |
| <b>Herniarin</b>                 | 100 | $102 \pm 2$      | 2.17 | 101.87 | $102 \pm 2$      | 2.07 | 101.80 |
|                                  | 400 | $397 \pm 2$      | 0.64 | 99.12  | $397 \pm 1$      | 0.38 | 99.29  |
|                                  | 800 | $802 \pm 1$      | 0.15 | 100.25 | $801 \pm 3$      | 0.44 | 100.09 |
| <b>Cinnamic Acid</b>             | 100 | $99 \pm 0.8$     | 0.90 | 98.77  | $100 \pm 2$      | 2.21 | 100.14 |
|                                  | 400 | $403 \pm 3$      | 0.86 | 100.72 | $402 \pm 3$      | 0.79 | 100.52 |
|                                  | 800 | $804 \pm 2$      | 0.29 | 100.50 | $801.2 \pm 0.6$  | 0.07 | 100.16 |



Supplementary Table S2. shows the Results of the percent recovery study.

| POOL-1          |             |               |            |            |            |            |          |
|-----------------|-------------|---------------|------------|------------|------------|------------|----------|
| Sample Category | Sample Name | Spiking Level | % Recovery |            |            |            |          |
|                 |             |               | Rutin      | Myricitrin | Apigenin   | Diosmetin  | Galangin |
| Fruit           | Grapefruit  | S1            | 94.18      | 102.94     | 96.34      | 96.12      | 92.80    |
|                 |             | S2            | 98.16      | 98.23      | 92.78      | 93.17      | 106.59   |
|                 |             | S3            | 104.54     | 101.69     | 95.11      | 97.04      | 103.01   |
| Vegetable       | Spinach     | S1            | 92.98      | 97.59      | 96.42      | 101.52     | 95.42    |
|                 |             | S2            | 98.55      | 106.96     | 104.66     | 98.06      | 93.69    |
|                 |             | S3            | 96.61      | 103.58     | 102.62     | 91.51      | 91.66    |
| Other           | Corn        | S1            | 94.18      | 102.94     | 96.34      | 96.12      | 92.80    |
|                 |             | S2            | 98.16      | 98.23      | 92.78      | 93.17      | 106.59   |
|                 |             | S3            | 104.54     | 101.69     | 95.11      | 97.04      | 103.01   |
| POOL-2          |             |               |            |            |            |            |          |
| Sample Category | Sample Name | Spiking Level | % Recovery |            |            |            |          |
|                 |             |               | Hyperoside | Hesperidin | Naringenin | Kaempferol |          |
| Fruit           | Grapefruit  | S1            | 93.48      | 91.01      | 105.35     | 101.64     |          |
|                 |             | S2            | 103.69     | 102.96     | 98.11      | 93.48      |          |
|                 |             | S3            | 97.68      | 97.68      | 101.60     | 103.46     |          |
| Vegetable       | Spinach     | S1            | 104.21     | 96.01      | 87.34      | 98.38      |          |
|                 |             | S2            | 97.43      | 104.92     | 93.00      | 93.83      |          |

|                 |             | S3            | 96.11            | 95.53              | 90.57             | 95.38     |               |
|-----------------|-------------|---------------|------------------|--------------------|-------------------|-----------|---------------|
| Other           | Corn        | S1            | 93.48            | 91.01              | 105.35            | 101.64    |               |
|                 |             | S2            | 103.69           | 102.96             | 98.11             | 93.48     |               |
|                 |             | S3            | 97.68            | 97.68              | 101.60            | 103.46    |               |
| POOL-3          |             |               |                  |                    |                   |           |               |
| Sample Category | Sample Name | Spiking Level | % Recovery       |                    |                   |           |               |
|                 |             |               | Isoquercitrin    | Myricetin          | Quercetin         | Chrysin   | Kaempferide   |
| Fruit           | Grapefruit  | S1            | 97.51            | 100.02             | 106.64            | 94.54     | 103.41        |
|                 |             | S2            | 106.88           | 98.24              | 98.20             | 97.94     | 97.16         |
|                 |             | S3            | 96.70            | 103.85             | 97.00             | 90.70     | 100.28        |
| Vegetable       | Spinach     | S1            | 103.51           | 101.82             | 95.76             | 92.22     | 95.31         |
|                 |             | S2            | 92.30            | 99.56              | 100.41            | 105.40    | 103.67        |
|                 |             | S3            | 97.34            | 97.09              | 91.35             | 91.86     | 97.72         |
| Other           | Corn        | S1            | 97.51            | 100.02             | 106.64            | 94.54     | 103.41        |
|                 |             | S2            | 106.88           | 98.24              | 98.20             | 97.94     | 97.16         |
|                 |             | S3            | 96.70            | 103.85             | 97.00             | 90.70     | 100.28        |
| POOL-4          |             |               |                  |                    |                   |           |               |
| Sample Category | Sample Name | Spiking Level | % Recovery       |                    |                   |           |               |
|                 |             |               | Chlorogenic Acid | Trans-Ferulic Acid | Trans-Resveratrol | Herniarin | Cinnamic Acid |
| Fruit           | Grapefruit  | S1            | 101.29           | 97.66              | 96.68             | 94.67     | 97.39         |

|                  |                |           |        |        |        |       |        |
|------------------|----------------|-----------|--------|--------|--------|-------|--------|
|                  |                | <b>S2</b> | 98.63  | 96.63  | 103.61 | 99.12 | 94.97  |
|                  |                | <b>S3</b> | 103.30 | 101.12 | 98.45  | 97.50 | 91.62  |
| <b>Vegetable</b> | <b>Spinach</b> | <b>S1</b> | 99.64  | 90.20  | 101.56 | 89.84 | 101.47 |
|                  |                | <b>S2</b> | 91.49  | 103.18 | 98.18  | 91.62 | 99.28  |
|                  |                | <b>S3</b> | 92.24  | 92.87  | 95.72  | 98.22 | 89.83  |
| <b>Other</b>     | <b>Corn</b>    | <b>S1</b> | 101.29 | 97.66  | 96.68  | 94.67 | 97.39  |
|                  |                | <b>S2</b> | 98.63  | 96.63  | 103.61 | 99.12 | 94.97  |
|                  |                | <b>S3</b> | 103.30 | 101.12 | 98.45  | 97.50 | 91.62  |

**Supplementary Table S3.** The quantified results of food samples in mg/Kg.

| <b>POOL-1</b>                              |                    |              |                   |                 |                  |                 |
|--------------------------------------------|--------------------|--------------|-------------------|-----------------|------------------|-----------------|
| <b>Analyte Conc. mg/kg of Food Samples</b> |                    |              |                   |                 |                  |                 |
| <b>Sample Category</b>                     | <b>Sample Name</b> | <b>Rutin</b> | <b>Myricitrin</b> | <b>Apigenin</b> | <b>Diosmetin</b> | <b>Galangin</b> |
| <b>Fruits</b>                              | <b>Apple</b>       | ND           | 228.02 ± 1.5      | ND              | ND               | ND              |
|                                            | <b>Banana</b>      | ND           | ND                | 63.19 ± 5.5     | 73.48 ± 1.5      | ND              |
|                                            | <b>Grapefruit</b>  | ND           | ND                | 124.22 ± 0.9    | 39.00 ± 0.4      | 122.46 ± 0.8    |
|                                            | <b>Peach</b>       | ND           | ND                | ND              | ND               | ND              |
|                                            | <b>Grapes</b>      | ND           | ND                | 31.87 ± 0.4     | 25.81 ± 1.3      | ND              |
|                                            | <b>Plum</b>        | 277.45 ± 3.6 | ND                | 40.04 ± 1.4     | ND               | ND              |
|                                            | <b>Pear</b>        | 124.89 ± 5.3 | ND                | ND              | ND               | ND              |
| <b>Vegetables</b>                          | <b>Onion</b>       | ND           | 240.02 ± 1.1      | ND              | ND               | ND              |
|                                            | <b>Cabbage</b>     | 49.62 ± 1.8  | ND                | ND              | ND               | ND              |
|                                            | <b>Capsicum</b>    | ND           | ND                | ND              | ND               | ND              |
|                                            | <b>Garlic</b>      | ND           | ND                | ND              | ND               | ND              |
|                                            | <b>Lemon</b>       | ND           | ND                | ND              | ND               | ND              |
|                                            | <b>Tomato</b>      | 93.36 ± 3.6  | ND                | ND              | ND               | ND              |
|                                            | <b>Potato</b>      | 55.00 ± 3.3  | 75.36 ± 0.5       | ND              | ND               | ND              |
|                                            | <b>Spinach</b>     | 166.07 ± 0.4 | 398.18 ± 5.0      | ND              | ND               | ND              |
| <b>Others</b>                              | <b>Corn</b>        | 37.82 ± 0.7  | 148.24 ± 1.0      | ND              | 23.51 ± 1.0      | ND              |

|                                            |                     |                   |                   |                   |                   |              |
|--------------------------------------------|---------------------|-------------------|-------------------|-------------------|-------------------|--------------|
|                                            | <b>Rice</b>         | ND                | ND                | ND                | ND                | ND           |
|                                            | <b>Kidney beans</b> | ND                | ND                | ND                | ND                | 75.56 ± 0.6  |
|                                            | <b>Green Tea</b>    | 337.35 ± 0.2      | ND                | ND                | ND                | ND           |
|                                            | <b>Black Tea</b>    | 224.12 ± 0.2      | 121.08 ± 0.6      | ND                | ND                | ND           |
|                                            | <b>Turmeric</b>     | 62.69 ± 2.1       | ND                | ND                | 137.59 ± 1.3      | 100.20 ± 0.1 |
| <b>POOL-2</b>                              |                     |                   |                   |                   |                   |              |
| <b>Analyte Conc. mg/kg of Food Samples</b> |                     |                   |                   |                   |                   |              |
| <b>Sample Category</b>                     | <b>Sample Name</b>  | <b>Hyperoside</b> | <b>Hesperidin</b> | <b>Naringenin</b> | <b>Kaempferol</b> |              |
| <b>Fruits</b>                              | <b>Apple</b>        | 318.02 ± 2.3      | 162.62 ± 0.4      | ND                | ND                |              |
|                                            | <b>Banana</b>       | ND                | 245.66 ± 0.9      | ND                | 35.64 ± 0.5       |              |
|                                            | <b>Grapefruit</b>   | ND                | 2483.16 ± 0.5     | 108.92 ± 2.0      | ND                |              |
|                                            | <b>Peach</b>        | ND                | ND                | ND                | ND                |              |
|                                            | <b>Grapes</b>       | ND                | 102.32 ± 1.4      | 52.77 ± 1.7       | 55.95 ± 1.2       |              |
|                                            | <b>Plum</b>         | 134.23 ± 1.6      | 165.16 ± 0.5      | ND                | 63.94 ± 1.7       |              |
|                                            | <b>Pear</b>         | 110.28 ± 2.1      | ND                | ND                | ND                |              |
| <b>Vegetables</b>                          | <b>Onion</b>        | 332.78 ± 1.5      | 37.82 ± 0.9       | ND                | 35.64 ± 5.8       |              |
|                                            | <b>Cabbage</b>      | 118.85 ± 1.4      | ND                | ND                | ND                |              |
|                                            | <b>Capsicum</b>     | 44.93 ± 4.1       | 62.25 ± 0.4       | ND                | 64.53 ± 1.0       |              |
|                                            | <b>Garlic</b>       | ND                | ND                | ND                | ND                |              |
|                                            | <b>Lemon</b>        | ND                | 303.18 ± 3.1      | ND                | ND                |              |

|               |                     |               |              |             |             |
|---------------|---------------------|---------------|--------------|-------------|-------------|
|               | <b>Tomato</b>       | ND            | 69.98 ± 4.8  | 39.34 ± 2.8 | ND          |
|               | <b>Potato</b>       | ND            | ND           | ND          | ND          |
|               | <b>Spinach</b>      | ND            | ND           | ND          | 69.30 ± 2.0 |
| <b>Others</b> | <b>Corn</b>         | 45.57 ± 0.2   | ND           | ND          | ND          |
|               | <b>Rice</b>         | ND            | ND           | ND          | ND          |
|               | <b>Kidney beans</b> | ND            | 168.96 ± 2.7 | ND          | ND          |
|               | <b>Green Tea</b>    | 1098.34 ± 0.3 | 158.08 ± 0.5 | ND          | ND          |
|               | <b>Black Tea</b>    | 273.86 ± 0.3  | 103.04 ± 0.5 | ND          | ND          |
|               | <b>Turmeric</b>     | 49.17 ± 1.6   | ND           | ND          | 30.93 ± 0.1 |

| <b>POOL-3</b>                              |                    |                      |                  |                  |                |                    |
|--------------------------------------------|--------------------|----------------------|------------------|------------------|----------------|--------------------|
| <b>Analyte Conc. mg/kg of Food Samples</b> |                    |                      |                  |                  |                |                    |
| <b>Sample Category</b>                     | <b>Sample Name</b> | <b>Isoquercitrin</b> | <b>Myricetin</b> | <b>Quercetin</b> | <b>Chrysin</b> | <b>Kaempferide</b> |
| <b>Fruits</b>                              | <b>Apple</b>       | 319.33 ± 0.1         | 199.83 ± 1.9     | ND               | ND             | ND                 |
|                                            | <b>Banana</b>      | ND                   | 68.21 ± 2.7      | 160.89 ± 1.4     | ND             | ND                 |
|                                            | <b>Grapefruit</b>  | 80.40 ± 1.3          | 301.74 ± 2.1     | ND               | 32.97 ± 3.7    | 48.94 ± 0.6        |
|                                            | <b>Peach</b>       | ND                   | ND               | ND               | ND             | ND                 |
|                                            | <b>Grapes</b>      | 71.82 ± 1.2          | ND               | ND               | ND             | ND                 |
|                                            | <b>Plum</b>        | 168.43 ± 2.2         | 42.42 ± 1.4      | 30.96 ± 3.3      | ND             | ND                 |

|                                            |                     |                         |                                  |                                 |                  |                      |
|--------------------------------------------|---------------------|-------------------------|----------------------------------|---------------------------------|------------------|----------------------|
|                                            | <b>Pear</b>         | 38.92 ± 2.6             | 131.19 ± 1.5                     | ND                              | ND               | ND                   |
| <b>Vegetables</b>                          | <b>Onion</b>        | ND                      | 68.21 ± 1.1                      | 160.89 ± 0.9                    | ND               | ND                   |
|                                            | <b>Cabbage</b>      | 43.02 ± 1.8             | 51.35 ± 2.2                      | ND                              | ND               | ND                   |
|                                            | <b>Capsicum</b>     | ND                      | ND                               | ND                              | ND               | ND                   |
|                                            | <b>Garlic</b>       | ND                      | 80.14 ± 1.0                      | 190.31 ± 1.9                    | ND               | ND                   |
|                                            | <b>Lemon</b>        | 96.17 ± 0.1             | 215.15 ± 2.1                     | 172.25 ± 1.9                    | ND               | ND                   |
|                                            | <b>Tomato</b>       | ND                      | ND                               | 62.53 ± 1.9                     | ND               | ND                   |
|                                            | <b>Potato</b>       | 41.64 ± 1.3             | 51.95 ± 3.3                      | ND                              | ND               | ND                   |
|                                            | <b>Spinach</b>      | 122.11 ± 1.0            | 245.75 ± 0.2                     | 70.68 ± 2.0                     | ND               | ND                   |
| <b>Others</b>                              | <b>Corn</b>         | ND                      | 37.46 ± 0.1                      | ND                              | ND               | ND                   |
|                                            | <b>Rice</b>         | 49.14 ± 0.3             | ND                               | ND                              | ND               | ND                   |
|                                            | <b>Kidney beans</b> | 201.10 ± 0.2            | ND                               | ND                              | 112.65 ± 0.2     | ND                   |
|                                            | <b>Green Tea</b>    | 227.75 ± 0.1            | 182.15 ± 1.8                     | 72.18 ± 0.1                     | ND               | ND                   |
|                                            | <b>Black Tea</b>    | 130.48 ± 0.4            | 140.87 ± 0.1                     | 54.14 ± 0.7                     | ND               | ND                   |
|                                            | <b>Turmeric</b>     | 29.84 ± 0.1             | ND                               | ND                              | ND               | 118.31 ± 0.1         |
| <b>POOL-4</b>                              |                     |                         |                                  |                                 |                  |                      |
| <b>Analyte Conc. mg/kg of Food Samples</b> |                     |                         |                                  |                                 |                  |                      |
| <b>Sample Category</b>                     | <b>Sample Name</b>  | <b>Chlorogenic Acid</b> | <b><i>Trans</i>-Ferulic Acid</b> | <b><i>Trans</i>-Resveratrol</b> | <b>Herniarin</b> | <b>Cinnamic Acid</b> |
| <b>Fruits</b>                              | <b>Apple</b>        | 216.39 ± 0.8            | 81.03 ± 0.3                      | ND                              | ND               | ND                   |
|                                            | <b>Banana</b>       | 73.74 ± 1.5             | 22.17 ± 3.6                      | ND                              | ND               | 48.38 ± 1.3          |

|                   |                     |              |              |              |             |             |
|-------------------|---------------------|--------------|--------------|--------------|-------------|-------------|
|                   | <b>Grapefruit</b>   | ND           | 156.79 ± 2.3 | 80.31 ± 0.4  | 36.00 ± 1.3 | ND          |
|                   | <b>Peach</b>        | 200.62 ± 0.4 | ND           | ND           | ND          | ND          |
|                   | <b>Grapes</b>       | 34.75 ± 2.5  | 64.40 ± 1.3  | 38.24 ± 3.6  | ND          | 23.00 ± 3.1 |
|                   | <b>Plum</b>         | 54.27 ± 1.4  | 98.53 ± 1.3  | 42.69 ± 2.0  | ND          | 35.24 ± 3.6 |
|                   | <b>Pear</b>         | 99.20 ± 0.2  | ND           | ND           | ND          | ND          |
| <b>Vegetables</b> | <b>Onion</b>        | ND           | ND           | ND           | ND          | ND          |
|                   | <b>Cabbage</b>      | ND           | ND           | ND           | ND          | ND          |
|                   | <b>Capsicum</b>     | ND           | ND           | ND           | ND          | ND          |
|                   | <b>Garlic</b>       | ND           | ND           | ND           | ND          | ND          |
|                   | <b>Lemon</b>        | 81.21 ± 0.2  | 108.62 ± 1.0 | 49.79 ± 0.8  | ND          | ND          |
|                   | <b>Tomato</b>       | 57.51 ± 0.3  | 28.27 ± 0.2  | ND           | ND          | ND          |
|                   | <b>Potato</b>       | 153.15 ± 0.5 | ND           | ND           | ND          | ND          |
|                   | <b>Spinach</b>      | 45.63 ± 1.3  | 142.48 ± 0.7 | ND           | ND          | ND          |
| <b>Others</b>     | <b>Corn</b>         | ND           | 157.01 ± 0.1 | BQL          | ND          | 20.79 ± 0.1 |
|                   | <b>Rice</b>         | ND           | 60.07 ± 2.1  | ND           | ND          | ND          |
|                   | <b>Kidney beans</b> | ND           | 132.78 ± 1.0 | BQL          | ND          | ND          |
|                   | <b>Green Tea</b>    | ND           | 269.20 ± 0.1 | 54.61 ± 0.9  | ND          | ND          |
|                   | <b>Black Tea</b>    | ND           | 105.42 ± 0.1 | 145.10 ± 1.0 | ND          | ND          |
|                   | <b>Turmeric</b>     | ND           | 67.44 ± 0.7  | ND           | ND          | ND          |

ND: Not detected

BQL: Below quantification limit



**Supplementary Table S4.** Tested parameters for the final optimization of HPLC method.

| Pool No.      | Flow Rate (mL/min)                                                           | Injection Volume (μL) | Mobile Phase Gradient                                                                                                    |
|---------------|------------------------------------------------------------------------------|-----------------------|--------------------------------------------------------------------------------------------------------------------------|
| <b>Pool-1</b> | 0.3                                                                          | 3                     | 10-30% B, 0–1 min; 30-40% B, 1–2 min; 40-80% B, 2–5 min; 80-40% B, 5–7 min; 40-30% B, 7–8 min; 30-10% B, 8–10 min        |
|               | 0.35                                                                         | 2.5                   | 10-20% B, 0–1 min; 20-40% B, 1–3 min; 40-80% B, 3–6 min; 80-40% B, 6–7 min; 40-20% B, 7–8 min; 20-10% B, 8–10 min        |
|               | 0.35                                                                         | 2                     | 20-30% B, 0–1 min; 30-40% B, 1–3 min; 40-80% B, 3–5 min; 80-40% B, 5–7 min; 40-30% B, 7–8 min; 30-20% B, 8–10 min        |
| <b>Pool-2</b> | 0.3                                                                          | 3                     | 10% B, 0–1 min; 10-90% B, 1–7 min; 90% B, 7-8 min; 90-10% B, 8-9 min; 10% B, 9-10 min                                    |
|               | 0.3 mL/min, (0-5) min,<br>0.2 mL/min, (5-10) min,<br>0.3 mL/min, (10-13) min | 2.5                   | 20-30% B, 0–1 min; 30-40% B, 1–4 min; 40-70% B, 4–5 min; 70-80% B, 5–10 min; 80-30% B, 10–11 min; 30-20% B, 11-13 min    |
|               | 0.35 mL/min, (0-3) min,<br>0.5 mL/min, (4-5) min,<br>0.35 mL/min, (5-8) min  | 2                     | 20-30% B, 0–1 min; 30-40% B, 1–3 min; 40-70% B, 3–4.5 min; 70-40% B, 4.5–6.5 min; 40-30% B, 6.5–7 min; 30-20% B, 7–8 min |

|               |      |     |                                                                                                 |
|---------------|------|-----|-------------------------------------------------------------------------------------------------|
| <b>Pool-3</b> | 0.3  | 3   | 10-20% B, 0–1 min; 20-70% B, 1–6 min; 70% B, 6–8 min; 70-20% B, 8–9 min; 20-10% B, 9–10 min     |
|               | 0.35 | 2.5 | 20% B, 0–1 min; 20-70% B, 1–6 min; 80% B, 6–8 min; 80-20% B, 8–9 min; 20% B, 9–10 min           |
|               | 0.35 | 2   | 10-20% B, 0–1 min; 20-70% B, 1–5 min; 70% B, 5–7.5 min; 70-20% B, 7.5–8 min; 20-10% B, 8–10 min |
| <b>Pool-4</b> | 0.3  | 3   | 10% B, 0–1 min; 10-100% B, 1–8 min; 100-10% B, 8–9 min; 10% B, 9–10 min                         |
|               | 0.35 | 2.5 | 20% B, 0–1 min; 20-80% B, 1–8 min; 80-20% B, 8–9 min; 20% B, 9–10 min                           |
|               | 0.35 | 2   | 10% B, 0–1 min; 10-100% B, 1–6 min; 100-10% B, 6–7 min; 10% B, 7–8 min                          |
